# Supplementary material
Source: MDPI journal article supplement (https://www.mdpi.com/2076-3417/12/24/13038)
Supplement: s1 [file s1]

# Analysis of a Cardiac Necrosis Biomarker Release in Patients with Acute Myocardial Infarction via Nonlinear Mixed-Effects Models

## SUPPLEMENTARY MATERIALS

Anna Procopio, Salvatore De Rosa, Francesco Montefusco, Giovanni Canino, Alessio Merola, Jolanda Sabatino, Claudia Critelli, Ciro Indolfi, Francesco Amato and Carlo Cosentino\*

\* Correspondence: carlo.cosentino@unicz.it;

### S1 - Supplementary Figure S1

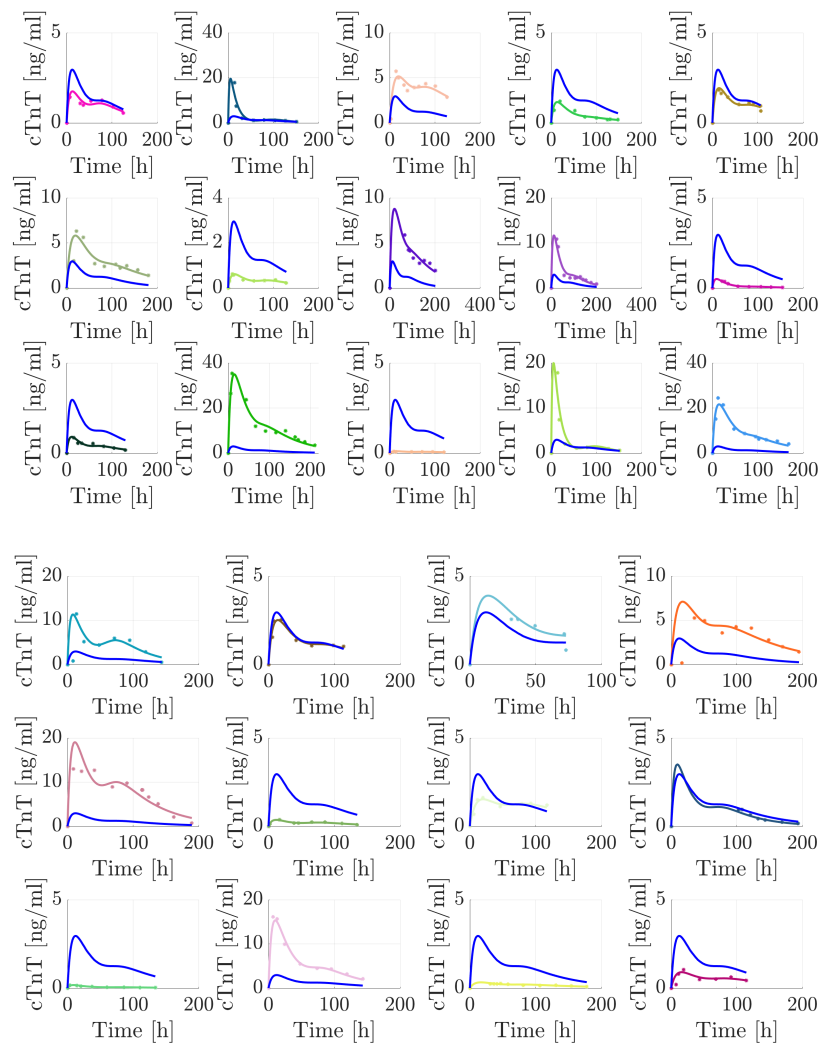

**Figure S1.** Model results for all the 27 analyzed STEMI patients. For each subject, the population model (red light line), obtained by the fixed effects estimated from all the patients, and the individual fit (colorful line), obtained taking into account the random effects, are reported. The experimental acquisitions are denoted by dots.
