# Supplementary material
Source: MDPI journal article supplement (https://www.mdpi.com/2076-3417/12/24/13038)

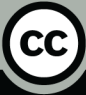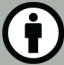

BY

Supplement: s1 [file s1]

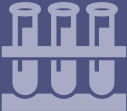

*applied  
sciences*

Supplement: s1 [file s1]

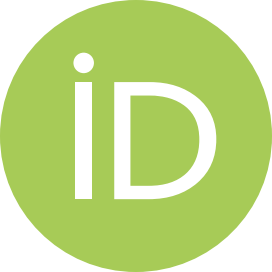

Supplement: s1 [file s1]
